# Supplementary material
Source: PubMed Central journal article supplement (PMC10115348)
Supplement: NIHMS1881123-supplement-Polymerization_backbone_suppl.pdf [file NIHMS1881123-supplement-Polymerization_backbone_suppl.pdf]

---

# Polymerization of the backbone of the pectic polysaccharide rhamnogalacturonan I

---

In the format provided by the authors and unedited

---

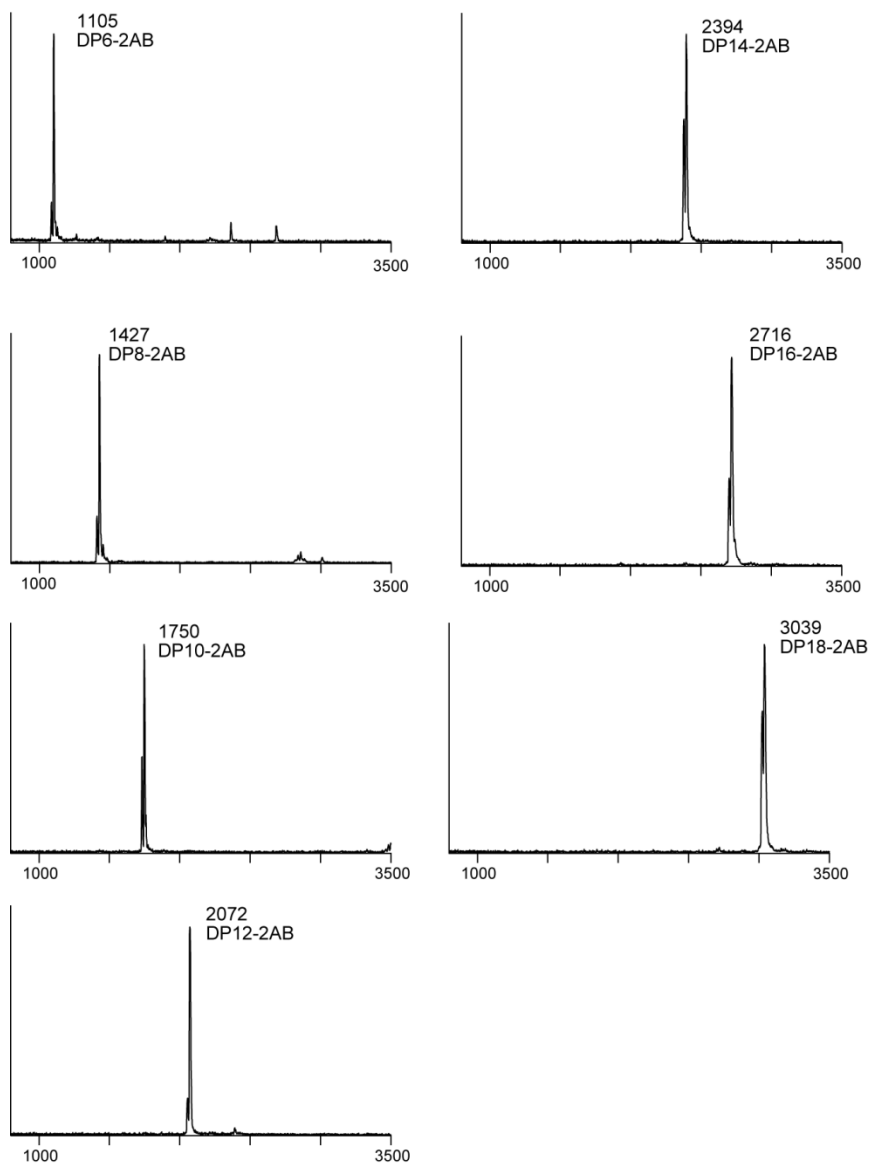

**Supplementary Figure 1. MALDI-TOF MS of RG-I acceptors purified by anion exchange chromatography.**

The purity of RG-I oligosaccharide fractions collected as in Supplemental Fig. 2B was assessed by MALDI-TOF mass spectrometry. DP, degree of polymerization.

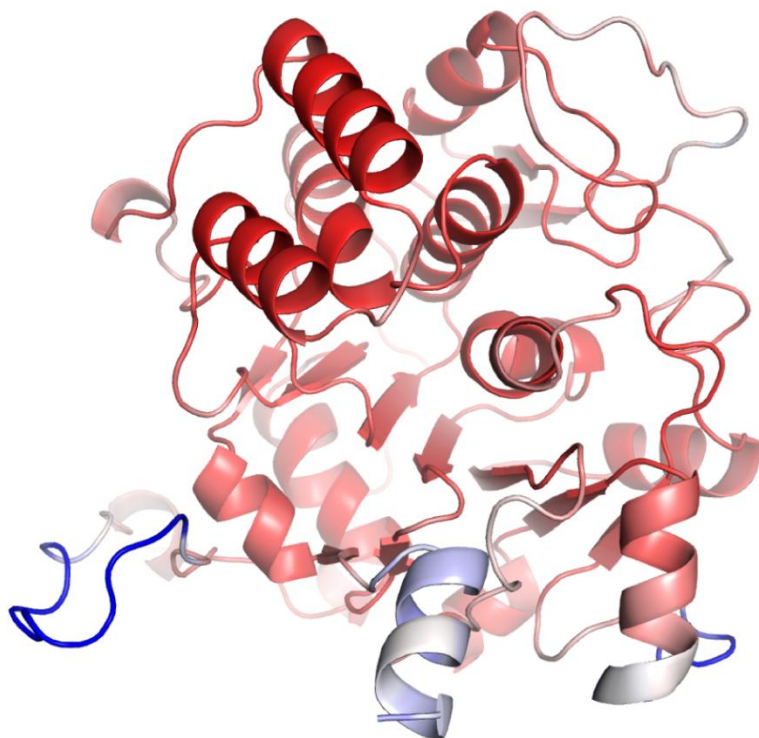

**Supplementary Figure 2.** Top ranked RGGAT1 model generated from AlphaFold2, colored by confidence intervals ranging from 60-100 (blue to red).

| Construct         | Primer sequence                                                     |
|-------------------|---------------------------------------------------------------------|
| MUC170Δ77F        | <u>AACTTGTACTTTCAAGGCGTCGGAAAAGGTGAAGATAGTC</u>                     |
| MUC170Δ77R        | <u>ACAAGAAAGCTGGGTCTTAAGCTGAATCTGGT</u>                             |
| RRT1Δ61F          | <u>AACTTGTACTTTCAAGGCTTGGGAGAGATGTGGGGA</u>                         |
| RRT1Δ61R          | <u>ACAAGAAAGCTGGGTCTAAATGACTCTCAATGGTTCA</u>                        |
| RRT2Δ62F          | <u>AACTTGTACTTTCAAGGCGGAGAGATGTGGGGACCT</u>                         |
| RRT2Δ62R          | <u>ACAAGAAAGCTGGGTCTAGGTTTCTTCTAGTGAATT</u>                         |
| RRT3Δ54F          | <u>AACTTGTACTTTCAAGGCTCCCAAATCTTCACTGGT</u>                         |
| RRT3Δ54R          | <u>ACAAGAAAGCTGGGTCTAACTGATACATTCTTGAGG</u>                         |
| RRT4Δ51F          | <u>AACTTGTACTTTCAAGGCGGTGAGCTTTGGCATTCC</u>                         |
| RRT4Δ51R          | <u>ACAAGAAAGCTGGGTCTAATGTGTTAAATTTCTATG</u>                         |
| Universal PrimerF | <u>GGGGACAAGTTTGTACAAAAAAGCAGGCTCTGAAA</u> <u>ACTTGTACTTTCAAGGC</u> |
| Universal PrimerR | <u>GGGGACCACTTTGTACAAGAAAGCTGGGTC</u>                               |

**Supplementary Table 1. All primers used for cloning.**

All primer sequences used are listed with universal sequences underlined.
